# Supplementary material
Source: PubMed Central journal article supplement (PMC9072807)
Supplement: mmc1.pdf [file mmc1.pdf]

**Cancer Cell, Volume 40**

**Supplemental information**

**COVID-19 vaccines elicit robust cellular immunity  
and clinical protection  
in chronic lymphocytic leukemia**

**Helen Parry, Rachel Bruton, Thomas Roberts, Graham McIlroy, Sarah Damery, Panagiota Sylla, Alexander C. Dowell, Gokhan Tut, Tara Lancaster, David Bone, Brian Willett, Nicola Logan, Sam Scott, Sam Hulme, Azar Jadir, Umayr Amin, Sam Nicol, Christine Stephens, Sian Faustini, Saly Al-Taei, Alex Richter, Daniel Blakeway, Kriti Verma, Sandra Margielewska-Davies, Hayden Pearce, Guy Pratt, Jianmin Zuo, Shankara Paneesha, and Paul Moss**

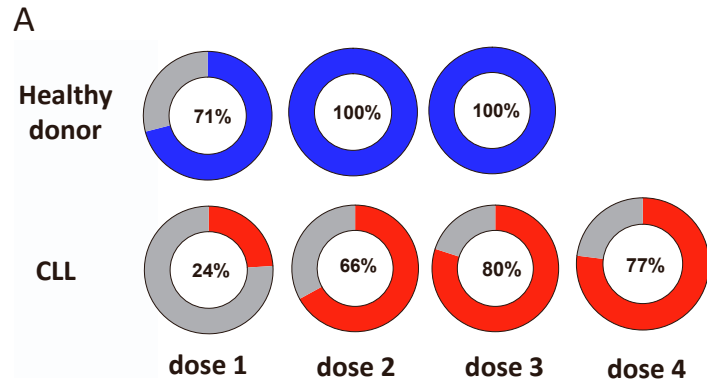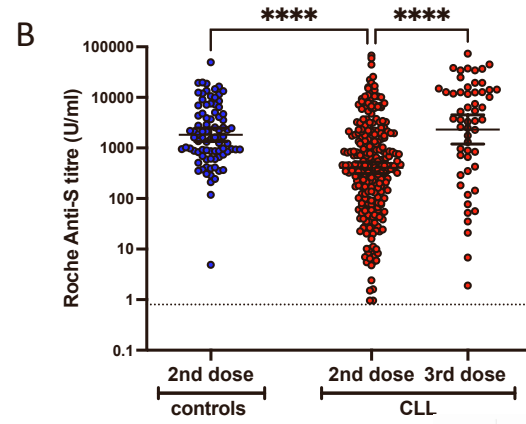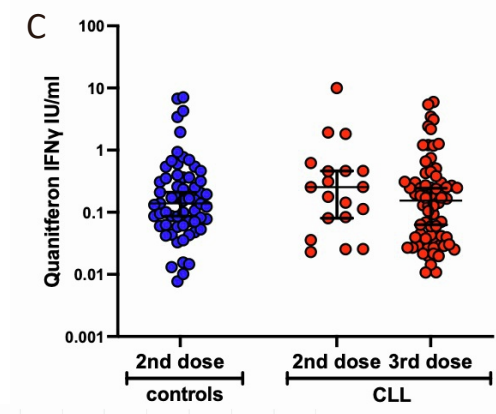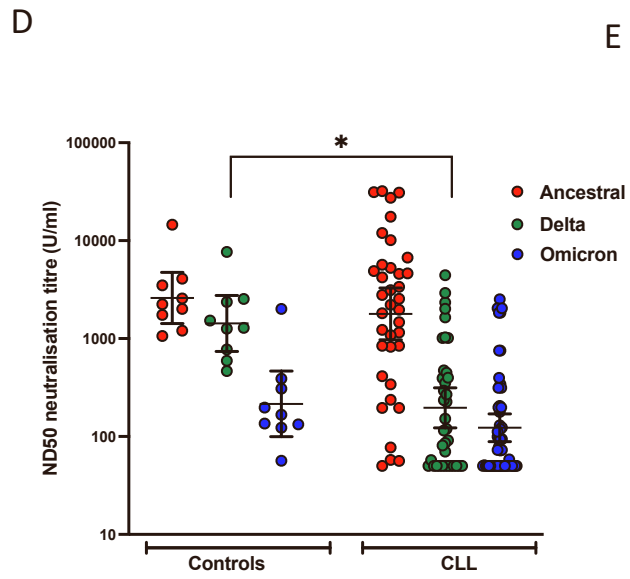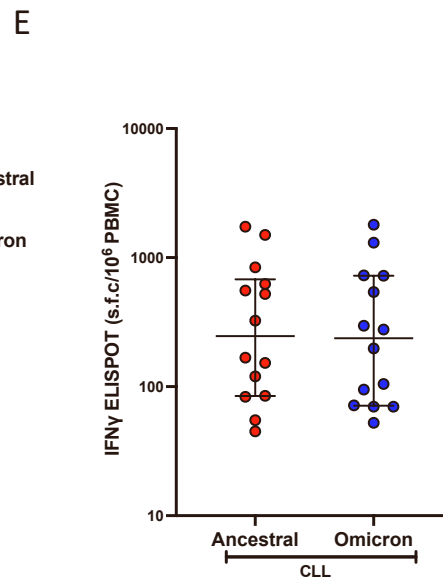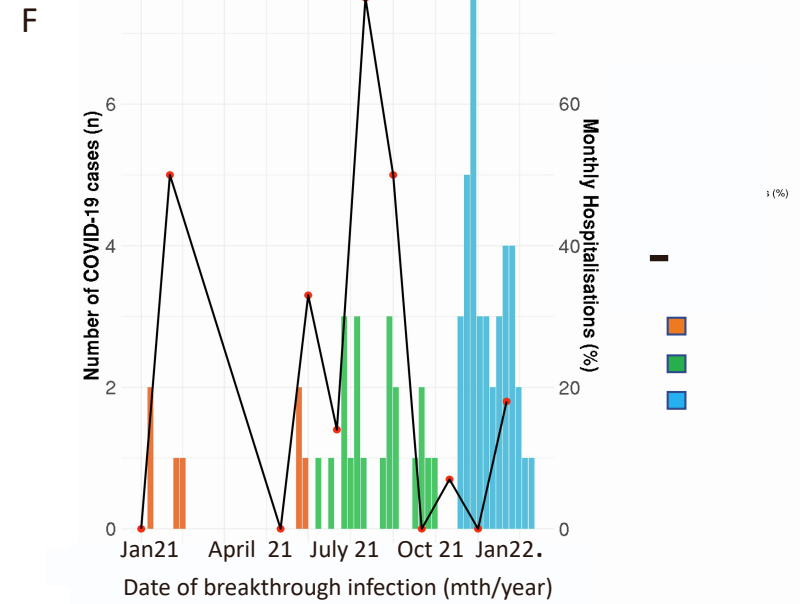

## Supplemental Figure S1.

### COVID-19 vaccines elicit robust cellular immunity and clinical protection in CLL

A. Proportion of CLL participants who developed a positive antibody response following 1<sup>st</sup> (n=267), 2<sup>nd</sup> (n=486), 3<sup>rd</sup> (n=374) and 4<sup>th</sup> (n=171) vaccine dose compared to healthy donors following 1<sup>st</sup> (n=93), 2<sup>nd</sup> (n=93) and 3<sup>rd</sup> dose (n=9). Participants with evidence of natural infection were excluded from analysis. B. Spike-specific antibody titer in participants with a positive antibody response following 2<sup>nd</sup> dose (n=257) compared to controls (n=85) ( $p < 0.0001$ ), and in CLL participants following 3<sup>rd</sup> dose (n=54) ( $p < 0.0001$ ) (Post hoc Dunn analysis). Cut-off for positive response is indicated by dotted line (GM and 95% CI shown). C. IFN $\gamma$  concentration following whole blood overnight stimulation with SARS-CoV-2 peptide pools is shown in CLL participants after 2<sup>nd</sup> (n=19) and 3<sup>rd</sup> vaccine doses (n=70) and controls (n=61) following 2<sup>nd</sup> dose (median and IQR shown). D. ND50 neutralising antibody titers against viral pseudotypes bearing ancestral, Delta and Omicron spike glycoproteins following 3<sup>rd</sup> vaccine dose from age-matched controls (n=9) and participants with CLL (n=37) (post hoc Dunn for Delta  $p = 0.03$ ) (GM and 95% CI shown). E. IFN- $\gamma$  ELISpot assay following 3<sup>rd</sup> vaccine dose in infection-naïve CLL patients following peptide stimulation with either ancestral or Omicron peptide pools ( $p = 0.33$ ) (Wilcoxon) (Median and IQR shown) (n=14). F. Bar chart to show the number and timing of breakthrough infections since first vaccine dose (n=66). Colors indicate dominant viral variants over the sample period. The proportion of infected participants who required hospitalisation is shown by the black line.

**Supplementary Table S1. Patient demographics by vaccine dose**

|                                                                     |                                | post 2nd vaccine | Post 3rd vaccine | post 4th vaccine |
|---------------------------------------------------------------------|--------------------------------|------------------|------------------|------------------|
| Number of patients                                                  |                                | 500              | 404              | 186              |
| Age (years)                                                         | Median                         | 67               | 67               | 68               |
|                                                                     | IQR                            | 60 to 72         | 62 to 73         | 63 to 72         |
|                                                                     | Range                          | 39 to 89         | 40 to 89         | 45 to 84         |
| Sex                                                                 | Men                            | 267 (53%)        | 216 (54%)        | 102 (55%)        |
|                                                                     | Women                          | 233 (47%)        | 188 (46%)        | 84 (45%)         |
| Vaccine received (first two doses)                                  | BNT162b2                       | 204 (41%)        | 161 (40%)        | 71 (38%)         |
|                                                                     | ChAdOx1                        | 296 (59%)        | 243 (60%)        | 115 (62%)        |
| Vaccine received (third dose)                                       | BNT162b2                       |                  | 375 (93%)        |                  |
|                                                                     | mRNA1273                       |                  | 18 (5%)          |                  |
|                                                                     | NVX-Co2373                     |                  | 10 (3%)          |                  |
|                                                                     | ChAdOx1                        |                  | 1 (0.2%)         |                  |
| Vaccine received (fourth dose)                                      | BNT162b2                       |                  |                  | 150 (81%)        |
|                                                                     | mRNA1273                       |                  |                  | 36 (19%)         |
| Time from vaccine dose to blood test (days)                         | Median                         | 20               | 20               | 21               |
|                                                                     | IQR                            | 17 to 29         | 17 to 27         | 17 to 29         |
|                                                                     | Range                          | 4 to 133         | 0 to 163         | 0 to 125         |
| Time since CLL diagnosis (months)                                   | Median                         | 73               | 77               | 75               |
|                                                                     | IQR                            | 34 to 133        | 36 to 135        | 37 to 124        |
|                                                                     | Range                          | 1 to 408         | 1 to 408         | 1 to 373         |
| CLL stage at diagnosis                                              | A                              | 429 (86%)        | 348 (86%)        | 158 (85%)        |
|                                                                     | B                              | 30 (6%)          | 21 (5%)          | 10 (5%)          |
|                                                                     | C                              | 41 (8%)          | 35 (9%)          | 18 (10%)         |
| Previous treatment                                                  | Watch and Wait                 | 279 (56%)        | 225 (56%)        | 102 (55%)        |
|                                                                     | Treatment planned              | 13 (3%)          | 10 (2%)          | 4 (2%)           |
|                                                                     | 1 line                         | 128 (26%)        | 104 (26%)        | 46 (25%)         |
|                                                                     | 2 lines                        | 48 (10%)         | 40 (10%)         | 23 (12%)         |
|                                                                     | 3+ lines                       | 32 (6%)          | 25 (6%)          | 11 (6%)          |
| On BTKi                                                             |                                | 99 (20%)         | 82 (20%)         | 38 (20%)         |
| On venetoclax                                                       |                                | 21 (4%)          | 18 (5%)          | 11 (6%)          |
| Previous chemotherapy                                               |                                | 143 (29%)        | 117 (29%)        | 56 (30%)         |
| Previous anti-CD20                                                  |                                | 153 (31%)        | 125 (31%)        | 61 (33%)         |
| History of infection                                                | Frequent infections            | 145 (29%)        | 114 (28%)        | 59 (32%)         |
|                                                                     | Hospitalisation with infection | 95 (19%)         | 72 (18%)         | 35 (17%)         |
| Prophylactic antibiotics                                            |                                | 37 (7%)          | 31 (8%)          | 15 (8%)          |
| IVIg                                                                |                                | 41 (8%)          | 33 (8%)          | 23 (12%)         |
| Immunoglobulin deficiency                                           | Number                         | 471              | 381              | 174              |
|                                                                     | IgG (<6g/L)                    | 236 (50%)        | 188 (49%)        | 97 (56%)         |
|                                                                     | IgA (<0.8g/L)                  | 232 (49%)        | 189 (50%)        | 88 (51%)         |
|                                                                     | IgM (<0.5g/L)                  | 177 (38%)        | 136 (36%)        | 65 (37%)         |
| *Patients on a delayed vaccine interval for first and second doses. |                                |                  |                  |                  |

## **Supplementary methods**

### **Study design and participants**

Patients with a diagnosis of CLL or small lymphocytic leukaemia (SLL) were recruited to study with no additional exclusion criteria. Informed consent was obtained by remote consultation and work performed under the CIA UPH IRAS approval (REC 20\NW\0240) from North-West and Preston ethics committee and conducted according to the Declaration of Helsinki. The dates and type of SARS-CoV-2 vaccination were obtained with self-reported information on stage and date of CLL diagnosis, CLL treatment and infection history as previously described. Participant demographics can be found in Table S1.

Samples were obtained 2-3 weeks following the second, third and fourth dose of vaccination. Local participants undertook phlebotomy whilst those more distant donated a dried blood spot sample (DBS). 93 healthy donor controls were recruited from local primary care networks (median age 73; (IQR 68-74.5); 56 were female (60%) and 59 received ChAdOx1 primary course and 34 received BNT162b2) .

### **Roche Elecsys® electrochemiluminescence immunoassay (ECLIA)**

Using ECLIA, qualitative IgG/A/M Anti-nucleocapsid protein (NP) antibodies specific to SARS-CoV-2 were detected (COV2, Product code: 09203079190); cut-off index value  $\geq 1.0$  considered positive for anti-nucleocapsid antibodies. Using the quantitative ECLIA assay, anti-spike (S) receptor binding domain antibodies were detected (COV2 S, Product code 09289275190) with values  $\geq 0.8$  U/ml considered positive.

### **Dried blood spot ELISA analysis**

Dried blood spot (DBS) analysis was carried out as previously described to ascertain the sero-positive rate amongst donors (Cook et al., 2021). IgG, IgA and IgM antibody isotypes against stabilised trimeric SARS-CoV-2 spike glycoprotein are reported with a positive result classed as a ratio of 1 or more.

### **Serum Immunoglobulin concentration**

Quantification of IgG, IgA and IgM was evaluated using the COBAS 6000 (Roche) at the University of Birmingham Clinical Immunology Service as previously described (Parry *et al.*, 2021).

### **Neutralization assays**

HEK293, HEK293T and 293-ACE2 cells were maintained in Dulbecco's modified Eagle's medium (DMEM) supplemented with 10% foetal bovine serum, 200mM L-glutamine, 100µg/ml streptomycin and 100 IU/ml penicillin. HEK293T cells were transfected with the appropriate SARS-CoV-2 spike gene expression vector in conjunction with lentiviral vectors p8.91 and pCSFLW using polyethylenimine (PEI, Polysciences, Warrington, USA). HIV (SARS-CoV-2) pseudotype-containing supernatants were harvested 48 hours post-transfection, aliquoted and frozen at -80°C prior to use. The SARS-CoV-2 spike glycoprotein expression constructs for ancestral Hu-1, B.1.617.2 and Omicron have been described previously (Willett et al., 2022). The delta construct bore the following mutations relative to the ancestral Hu-1 sequence (GenBank: MN908947): T19R, G142D, E156del, F157del, R158G, L452R, T478K, D614G, P681R, D950N. 293-ACE2 target cells were maintained in complete DMEM supplemented with 2µg/ml puromycin.

Neutralising activity in each sample was measured by a serial dilution approach. Each sample was serially diluted in triplicate from 1:50 to 1:36,450 in complete DMEM prior to incubation with approximately  $1 \times 10^6$  CPS per well of HIV (SARS-CoV-2) pseudotypes, incubated for 1 hour, and plated onto 239-ACE2 target cells. Luciferase activity was quantified after 48-72 hours by the addition of SteadyLite Plus chemiluminescence substrate and analysis on a Perkin Elmer EnSight multimode plate reader (Perkin Elmer, Beaconsfield, UK). Antibody titer was then estimated by interpolating the point at which infectivity had been reduced to 50% of the value for the 'no serum' control samples.

### **QuantiFERON assay**

T cell responses were measured by QuantiFERON assay, using the QuantiFERON SARS-CoV-2 assay (Catalogue 626715, QuantiFERON SARS-CoV-2 RUO, Qiagen). 1ml of whole blood was added to the test tubes, including QuantiFERON Nil (negative control), QuantiFERON Mitogen BCTs (positive control) and a QFN SARS CoV-2 Ag2 tube containing epitopes from whole spike that simulate both CD4+ and CD8+ T cells. After 18hr incubation, plasma was retrieved from each tube and an ELISA for IFN-γ release performed (Catalogue number 626410 QuantIFERON ELISA, Qiagen). The concentration of IFN-γ in IU/ml was confirmed after deduction of the QFN-SARS-CoV-2 Nil concentration.

### **ELISpot assay**

250,000 PBMC were incubated overnight with peptide pools containing 15-mer peptides overlapping by 10aa from SARS-CoV-2 spike S1 or S2 domains for either the ancestral

strain or the Omicron variant ( PepMix™ SARS-CoV-2 (Spike B.1.1.529 / Omicron)

Product Code: PM-SARS2-SMUT08-1

PepMix™ SARS-CoV-2 (Spike Glycoprotein) Product Code: PM-WCPV-S-2

JPT Peptide Technologies, Germany). T cell responses were determined using a Human IFN $\gamma$  ELISpot PRO kit (3420-3PT Mabtech, Sweden) and plates read using the Bioreader5000 (Bio-Sys, Germany)

### **Statistical analysis**

For comparative analysis, Mann-Whitney U-tests or Spearman rank correlation were performed and antibody data presented either as median or geometric means + 95% confidence intervals. Kruskal-Wallis was performed with post-hoc Dunn's analysis for comparative groups and Wilcoxon's matched-pairs signed rank test for paired responses. Logistic regression of clinical variables was tested for associations with positive antibody response after each vaccine dose. Chi-square analysis was used to compare proportions of responders and Kaplan-Meier for time to first treatment with Gehan-Breslow-Wilcoxon test reported. Analysis was performed using Graphpad prism v9.1.0 for Mac (San Diego, California USA) and SPSS Statistics v27.0 for Windows (Armonk, NY: IBM Corp.)

### **Supplementary references**

Cook, A.M., Faustini, S.E., Williams, L.J., Cunningham, A.F., Drayson, M.T., Shields, A.M., Kay, D., Taylor, L., Plant, T., Huissoon, A., et al. (2021). Validation of a combined ELISA to detect IgG, IgA and IgM antibody responses to SARS-CoV-2 in mild or moderate non-hospitalised patients. *Journal of immunological methods* 494.

Parry, H., McIlroy, G., Bruton, R., Ali, M., Stephens, C., Damery, S., Otter, A., McSkeane, T., Rolfe, H., Faustini, S., et al. (2021a). Antibody responses after first and second Covid-19 vaccination in patients with chronic lymphocytic leukaemia. *Blood Cancer Journal* 11, 1-8.

Willett, B.J., Grove, J., MacLean, O.A., Wilkie, C., Logan, N., Lorenzo, G.D., Furnon, W., Scott, S., Manali, M., Szemiel, A., et al. (2022). The hyper-transmissible SARS-CoV-2 Omicron variant exhibits significant antigenic change, vaccine escape and a switch in cell entry mechanism. *MedRxiv*.

<https://www.medrxiv.org/content/10.1101/2022.01.03.21268111v2>
